# Supplementary material
Source: ML conference proceedings conference paper supplement (https://openreview.net/forum?id=BpDa4YTKtO)
Supplement: supplementary_material [file attachment]

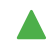

Hybrid, Input

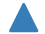

RRCheck, Input

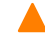

Naive, Input

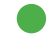

Hybrid, Response

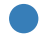

RRCheck, Response

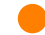

Naive, Response

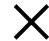

Some Malicious Users Flagged ( $\perp$  returned)
