# Supplementary material
Source: ML conference proceedings conference paper supplement (https://openreview.net/forum?id=BpDa4YTKtO)

$$m = 1500, \epsilon = 0.70$$

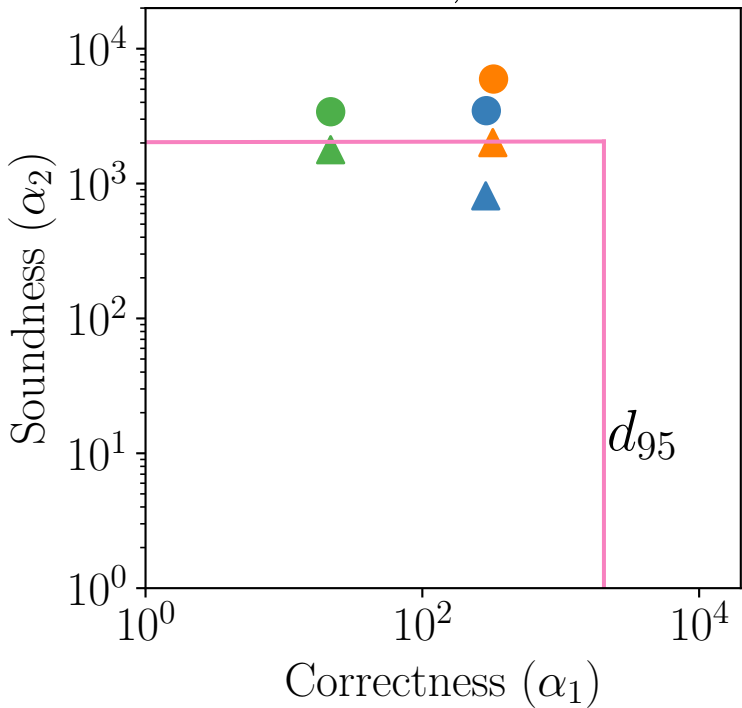

Supplement: supplementary_material [file attachment]

$$m = 40, \epsilon = 0.70$$

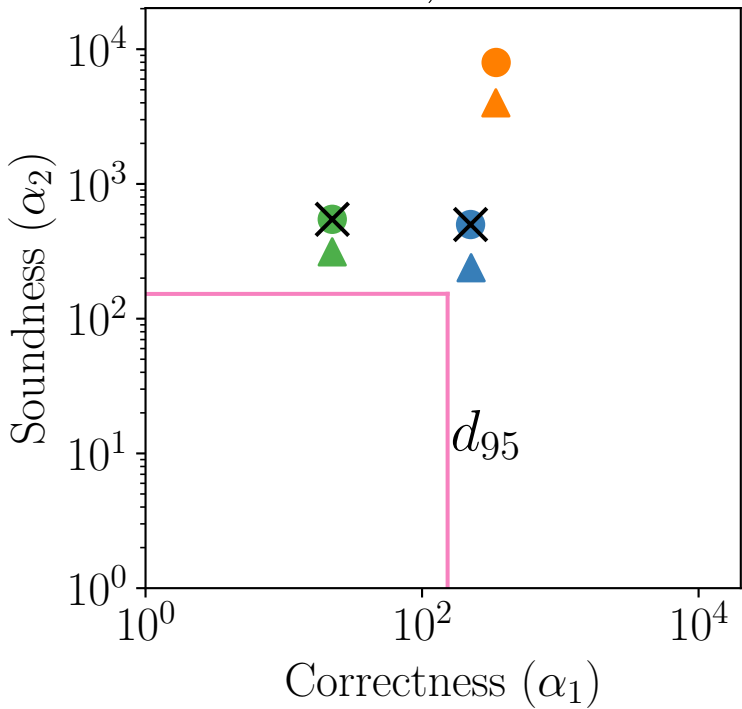

Supplement: supplementary_material [file attachment]

$$m = 1500, \epsilon = 3.00$$

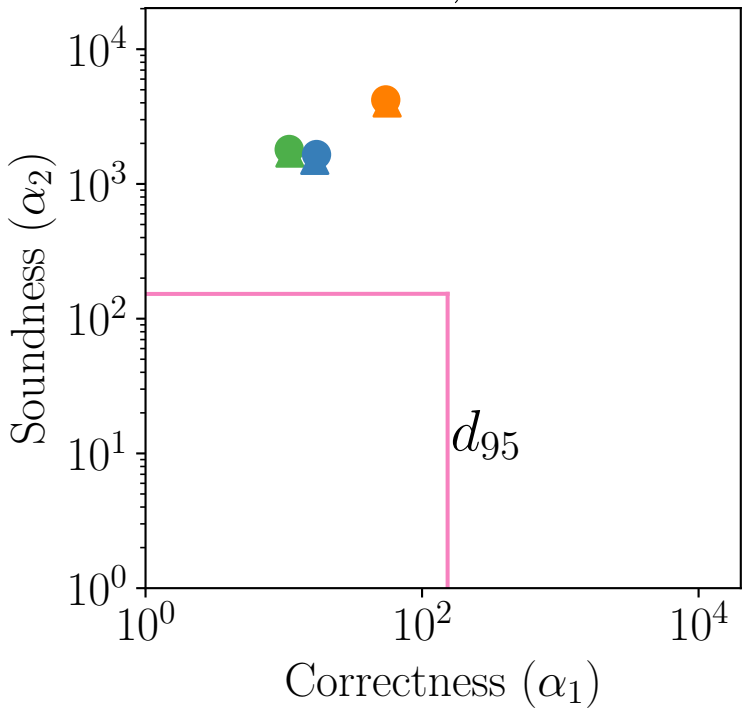

Supplement: supplementary_material [file attachment]

$$m = 40, \epsilon = 3.00$$

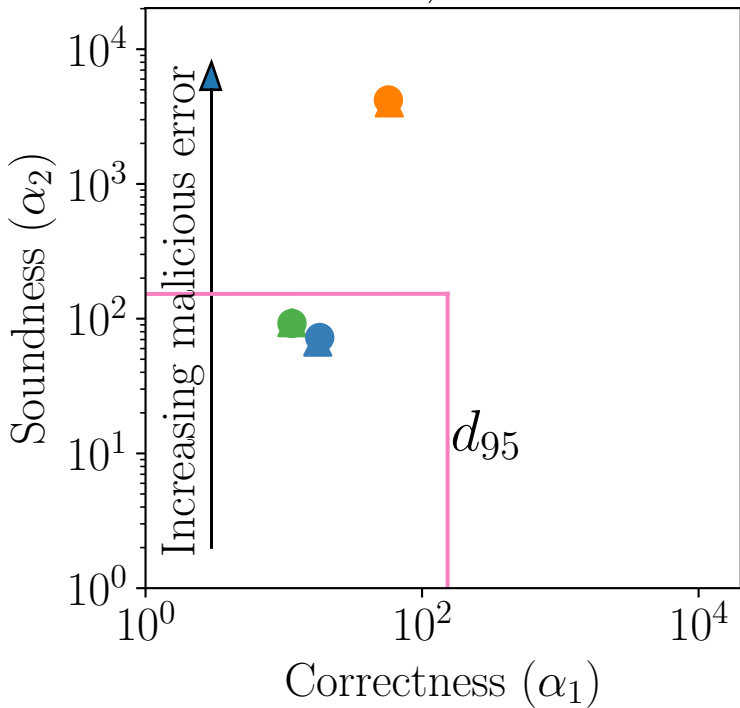

Supplement: supplementary_material [file attachment]

$$m = 40, \epsilon = 0.70$$

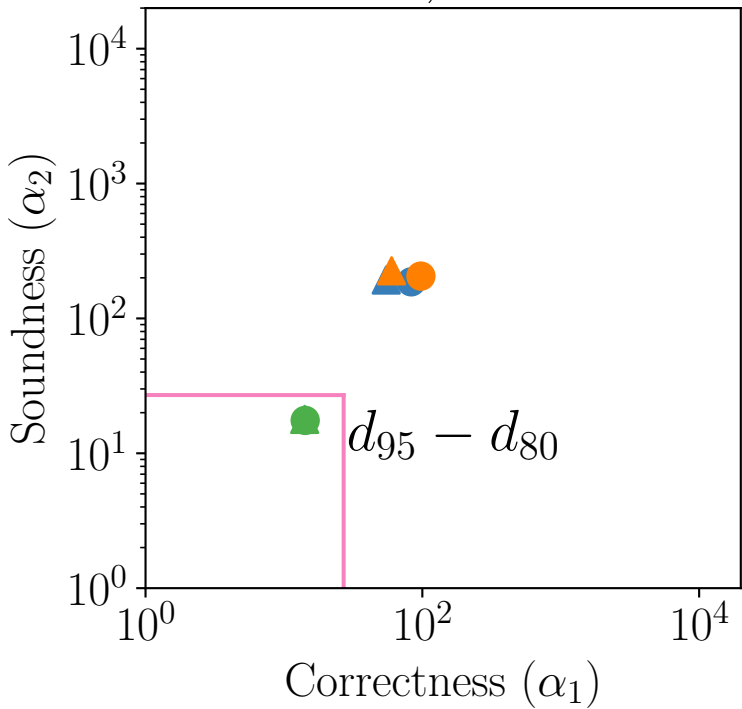

Supplement: supplementary_material [file attachment]

$$m = 40, \epsilon \in \{0.1, 0.5, \dots, 3\}$$

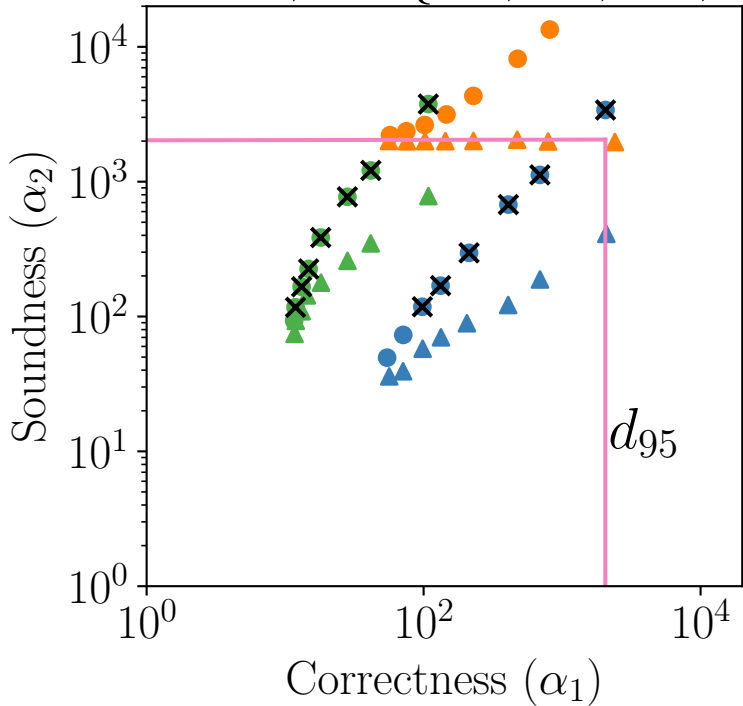

Supplement: supplementary_material [file attachment]

$$m = 1500, \epsilon = 0.70$$

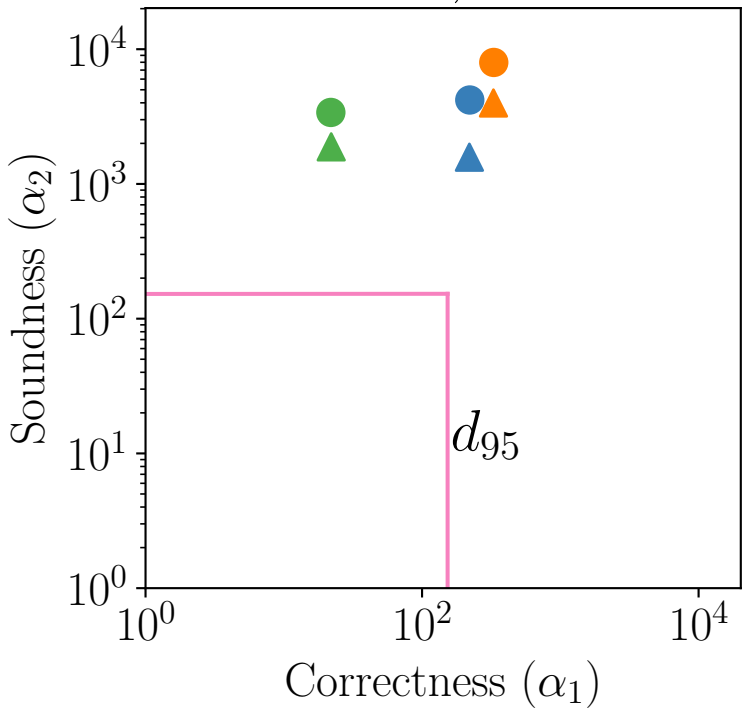

Supplement: supplementary_material [file attachment]

$$m = 40, \epsilon \in \{0.1, 0.5, \dots, 3\}$$

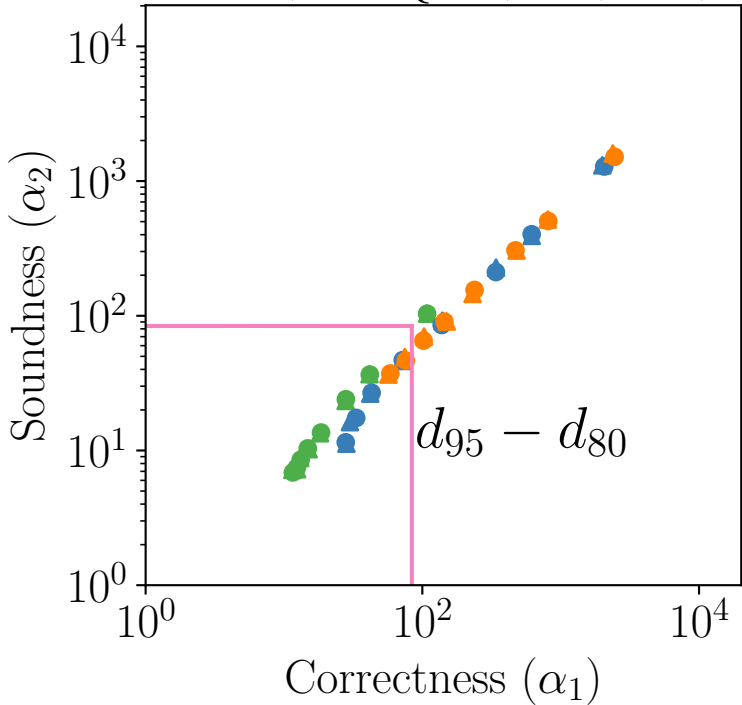

Supplement: supplementary_material [file attachment]

$$m = 40, \epsilon = 0.70$$

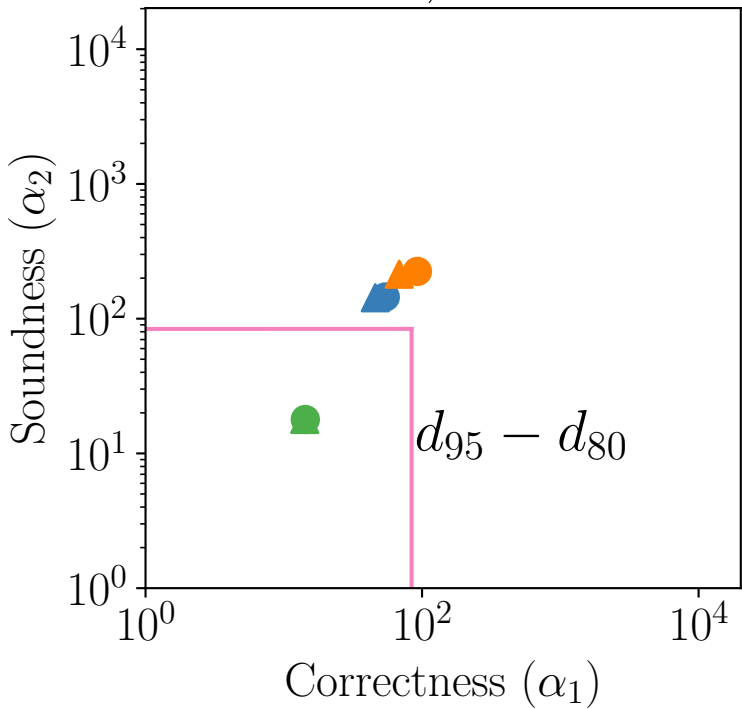

Supplement: supplementary_material [file attachment]

$$m = 40, \epsilon = 3.00$$

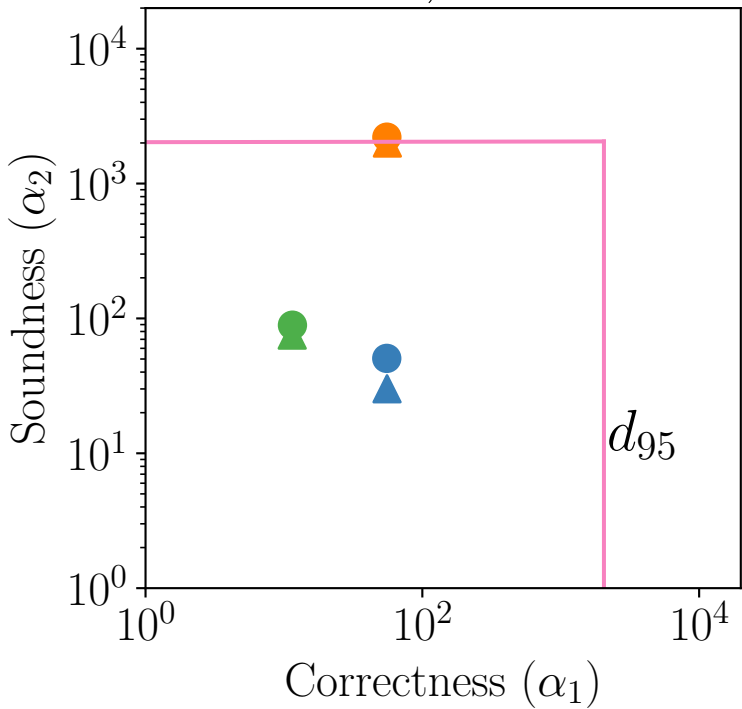

Supplement: supplementary_material [file attachment]

$$m = 40, \epsilon = 3.00$$

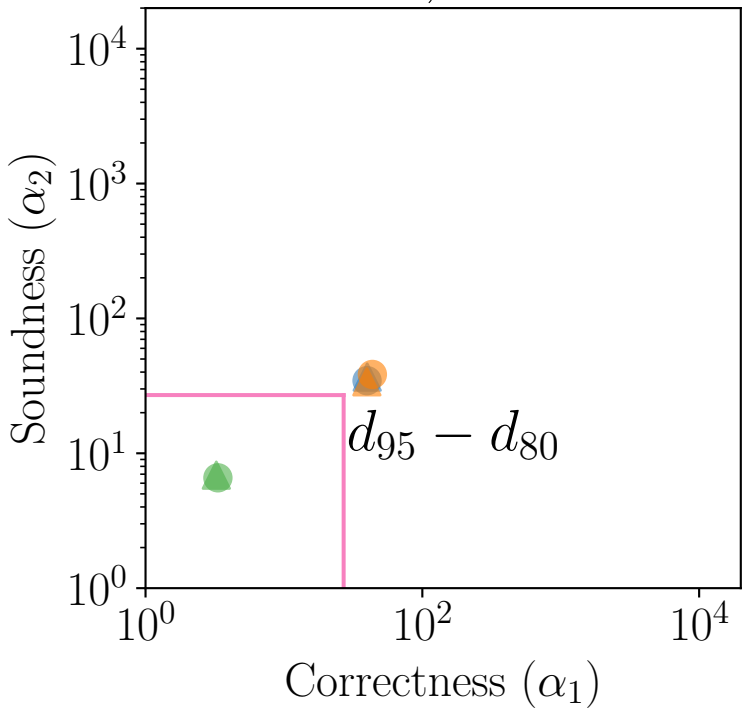

Supplement: supplementary_material [file attachment]

$$m = 1500, \epsilon = 3.00$$

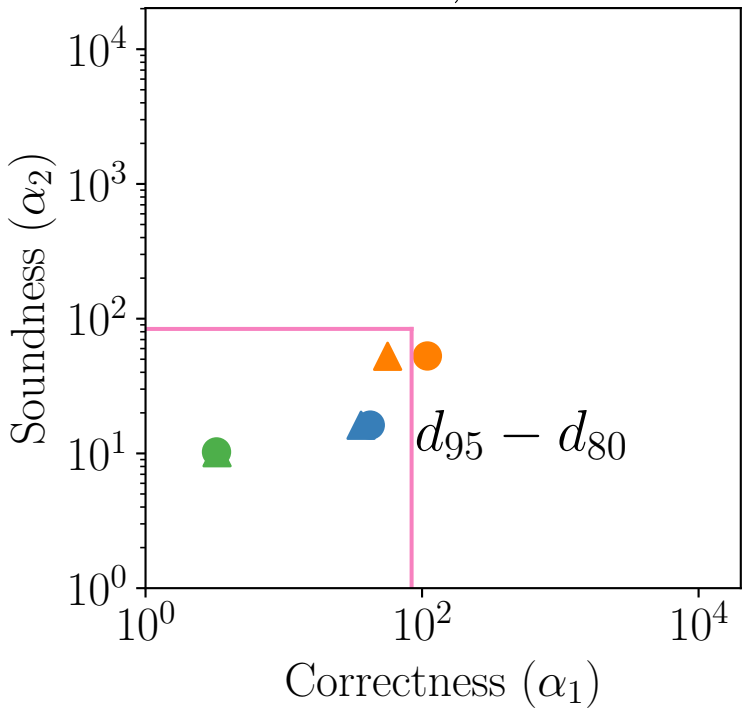

Supplement: supplementary_material [file attachment]

$$m = 40, \epsilon = 0.70$$

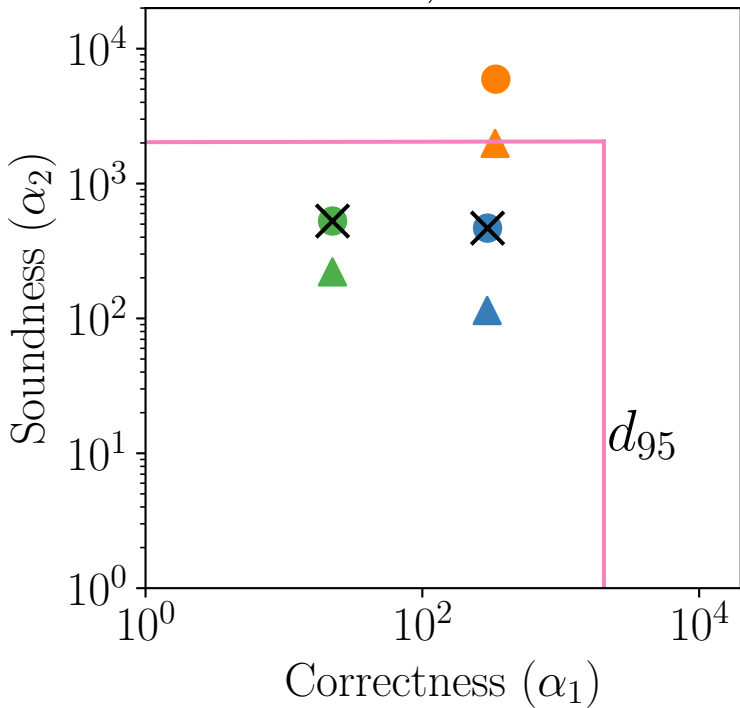

Supplement: supplementary_material [file attachment]

$$m = 1500, \epsilon = 0.70$$

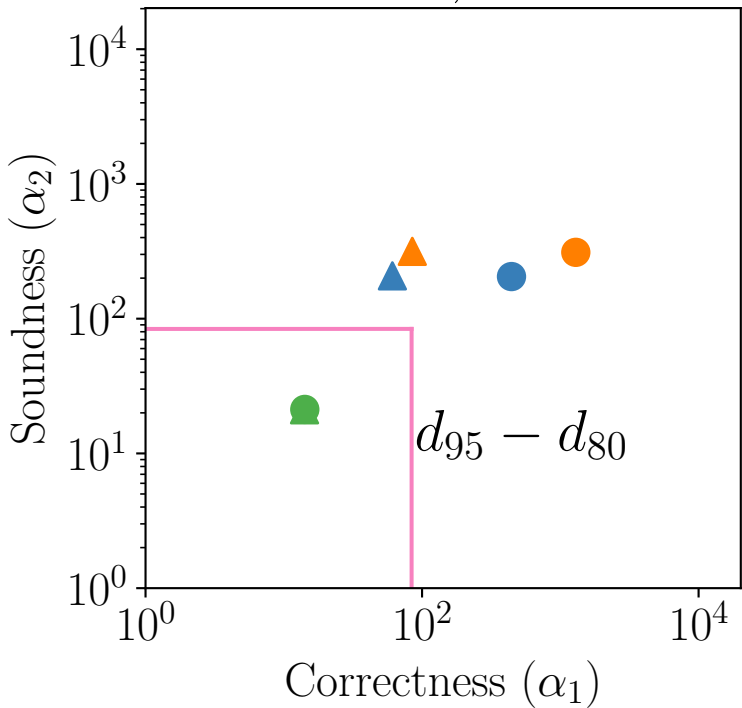

Supplement: supplementary_material [file attachment]

$$m = 40, \epsilon = 3.00$$

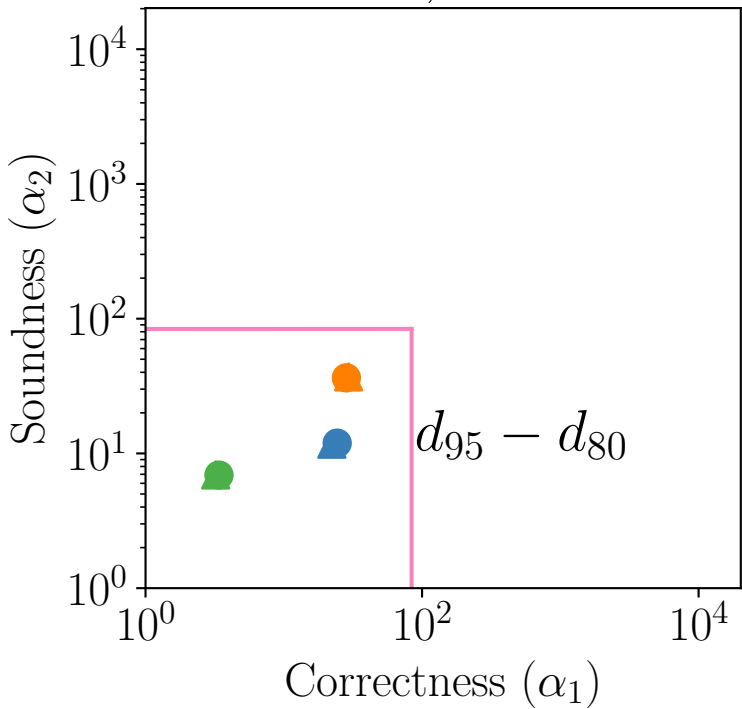

Supplement: supplementary_material [file attachment]

$$m = 1500, \epsilon = 3.00$$

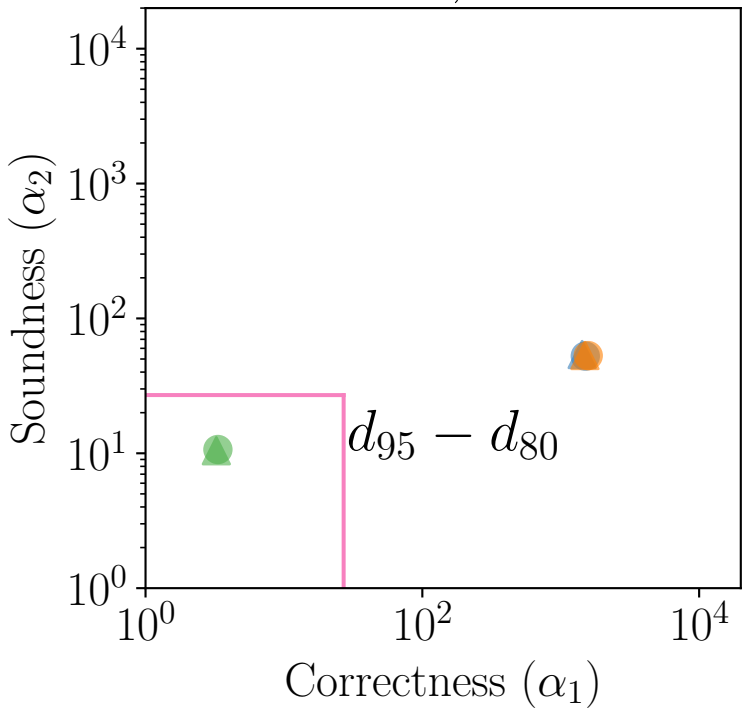

Supplement: supplementary_material [file attachment]

$$m = 1500, \epsilon = 0.70$$

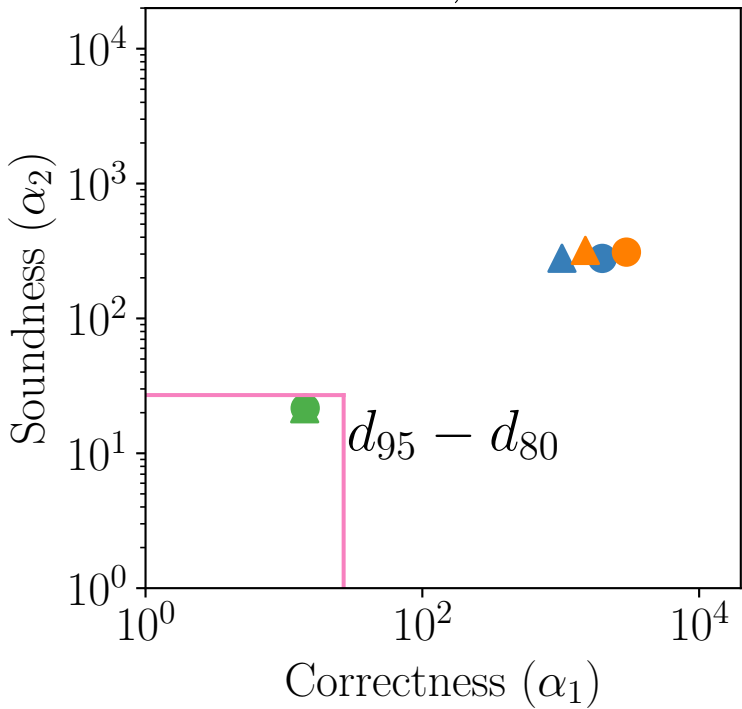

Supplement: supplementary_material [file attachment]

$$m = 1500, \epsilon = 3.00$$

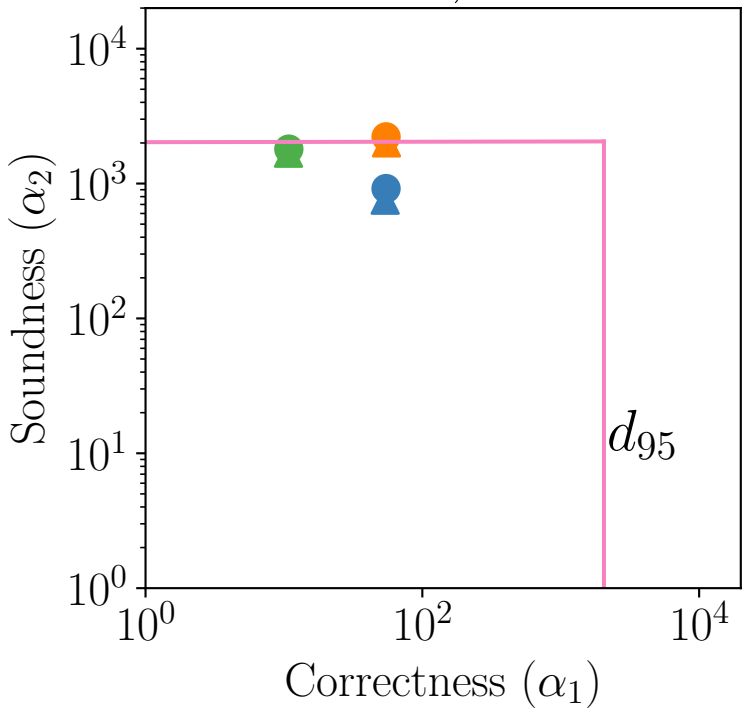

Supplement: supplementary_material [file attachment]
